# Supplementary material for: Glypican-1 is a novel immunohistochemical marker to differentiate poorly differentiated squamous cell carcinoma from solid predominant adenocarcinoma of the lung
Source: PubMed Central journal article supplement — Transl Lung Cancer Res. 2021 Feb;10(2):766–75. doi: 10.21037/tlcr-20-857 (PMC7947391; doi:10.21037/tlcr-20-857), 2021-02
Supplement: tlcr-10-02-766-dss.pdf [file tlcr-10-02-766-dss.pdf]

## Data Sharing Statement

|                     |                                                                                                                                                     |                                                                                             |
|---------------------|-----------------------------------------------------------------------------------------------------------------------------------------------------|---------------------------------------------------------------------------------------------|
| <b>Article Info</b> | http://dx.doi.org/10.21037/tlcr-20-857                                                                                                              |                                                                                             |
| <b>Item</b>         | <b>Question</b>                                                                                                                                     | <b>Authors' Response<br/>(place "-" if not applicable)</b>                                  |
| 1                   | Would you like to share data collected for your study to others?                                                                                    | I would like to share our data to others.                                                   |
| 2                   | If not, would you like to share the reason for your decision?                                                                                       | -                                                                                           |
| 3                   | What data in particular will be shared?                                                                                                             | Immunohistochemical staining scores                                                         |
| 4                   | Any other documents will be shared? Such as study protocol, statistical analysis plan, informed consent form, clinical study report, analytic code. | -                                                                                           |
| 5                   | When will data availability begin?                                                                                                                  | From the publication date                                                                   |
| 6                   | When will data availability end?                                                                                                                    | Two years after publication                                                                 |
| 7                   | To whom will you share the data?                                                                                                                    | Researchers who are interested in studies of glypican-1                                     |
| 8                   | For what type of analysis or purpose?                                                                                                               | No restriction                                                                              |
| 9                   | How or where can the data/documents be obtained?                                                                                                    | E-mails could be sent to the address below to obtain the shared data:<br>mryu0131@gmail.com |
| 10                  | Any other restrictions?                                                                                                                             | -                                                                                           |
