# Supplementary material for: Glypican-1 is a novel immunohistochemical marker to differentiate poorly differentiated squamous cell carcinoma from solid predominant adenocarcinoma of the lung
Source: PubMed Central journal article supplement — Transl Lung Cancer Res. 2021 Feb;10(2):766–75. doi: 10.21037/tlcr-20-857 (PMC7947391; doi:10.21037/tlcr-20-857), 2021-02
Supplement: tlcr-10-02-766-supplementary.pdf [file tlcr-10-02-766-supplementary.pdf]

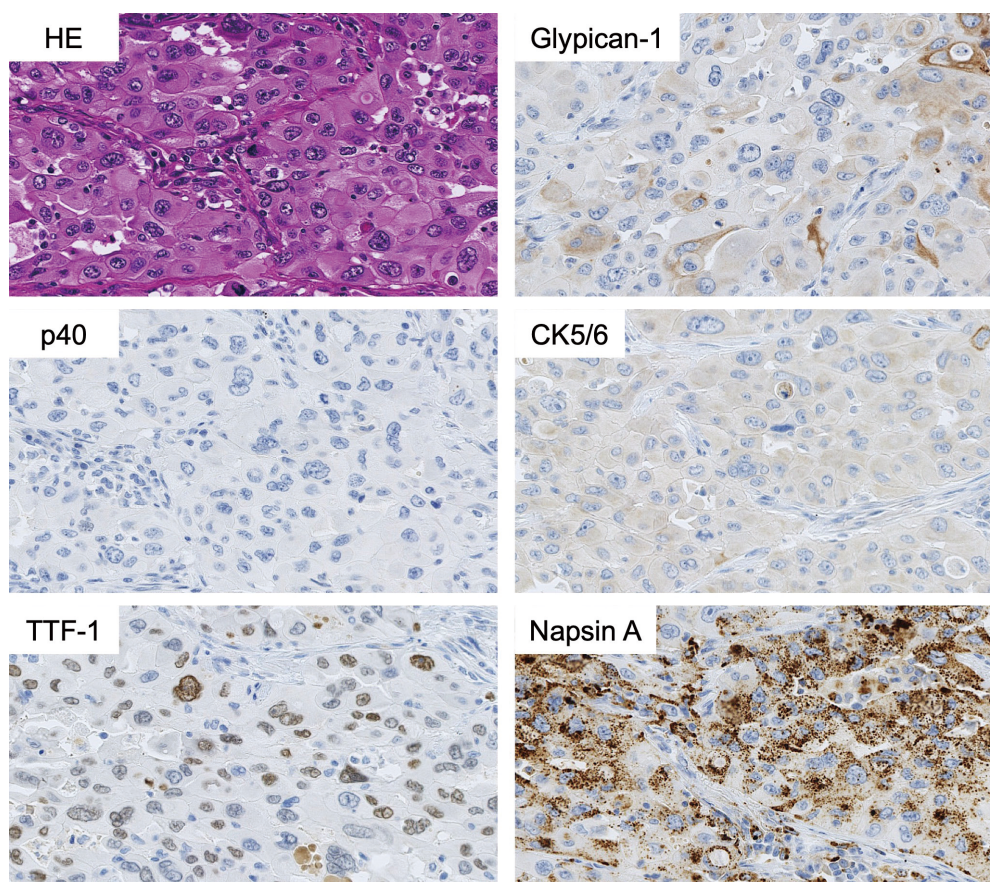

**Figure S1** One exceptional case of glypican-1-positive solid lung adenocarcinoma (1+). The tumor cells were immunohistochemically stained negative for p40 and cytokeratin 5/6 but were positive for thyroid transcription factor-1 (3+), and napsin A (3+).

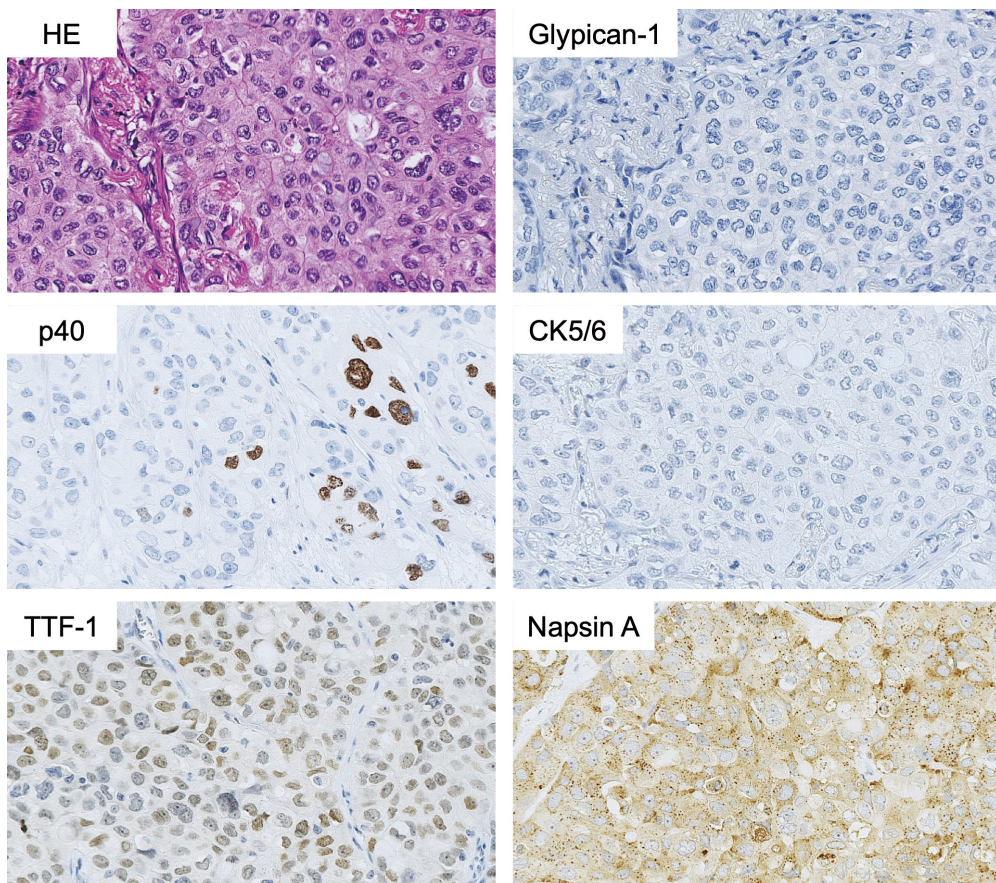

**Figure S2** One exceptional case of p40-positive solid lung adenocarcinoma (1+). The tumor cells were immunohistochemically stained negative for glypican-1 and cytokeratin 5/6 but were positive for thyroid transcription factor-1 (2+) and napsin A (3+).
